# Supplementary material for: Role of Hakai in m6A modification pathway in Drosophila
Source: PubMed Central journal article supplement (PMC8041851; doi:10.1038/s41467-021-22424-5), 2021-04-12
Supplement: 41467_2021_22424_MOESM1_ESM.pdf [file 41467_2021_22424_MOESM1_ESM.pdf]

**a**

## Our mass-spec data

| Bait   | Pulldown | Total Spectrum Count |
|--------|----------|----------------------|
| GFP    | Hakai    | 0                    |
| Fl(2)d | Hakai    | 5                    |
| Nito   | Hakai    | 2                    |

**b**

## DPiM mass-spec data

| Bait  | Pulldown | Unique peptides | Total peptides |
|-------|----------|-----------------|----------------|
| Hakai | Vir      | 5               | 6              |
| Hakai | Fl(2)d   | 5               | 5              |
| Hakai | Nito     | 3               | 3              |
| Flacc | Hakai    | 3               | 3              |

**Supplementary Figure 1. Interactions between Hakai and other m<sup>6</sup>A writer components from Mass-spec data**

**a** In our previous mass-spec experiments, using Fl(2)d and Nito, but not GFP, as baits can pull down Hakai. **b** From DPiM mass-spec dataset, Hakai as a bait can pull down Vir, Fl(2)d and Nito, while Flacc as a bait can pull down Hakai. Unique and total peptides pulled were shown.



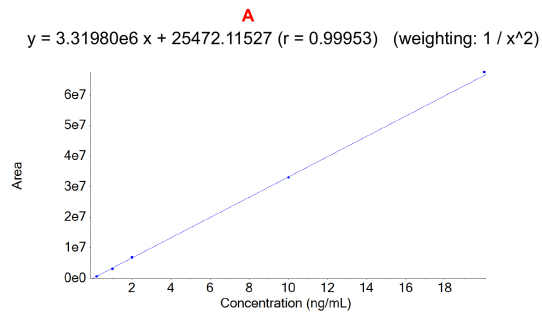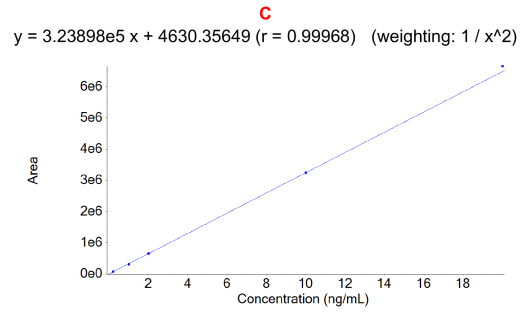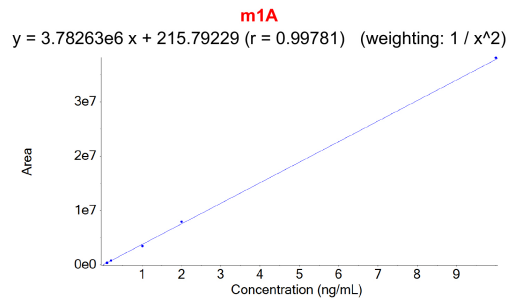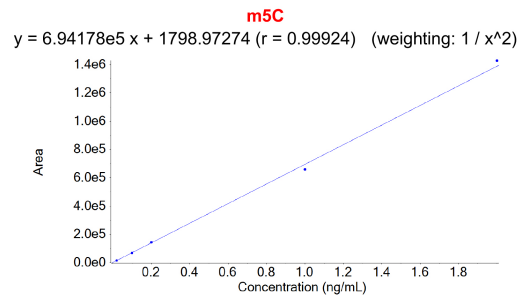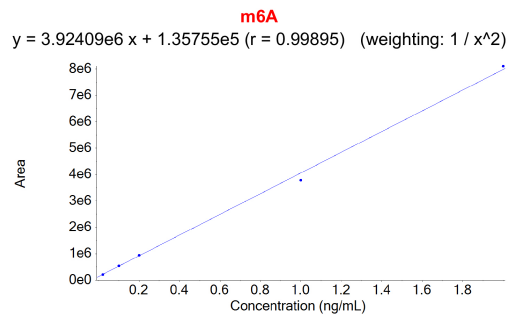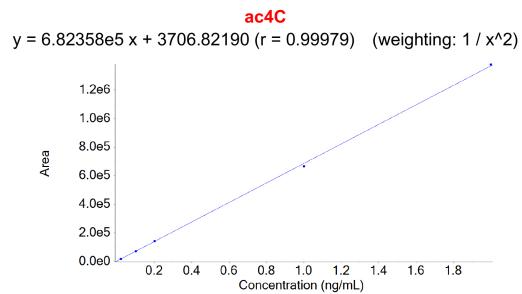

### Supplementary Figure 3. Calibration curves for nucleoside quantification

Standard calibration curves used for absolute quantifications of adenosine (A), N6-methyladenosine ( $m^6A$ ), N1-methyladenosine ( $m^1A$ ), cytidine (C), 5-methylcytidine ( $m^5C$ ), and N4-acetylcytidine ( $ac^4C$ ).

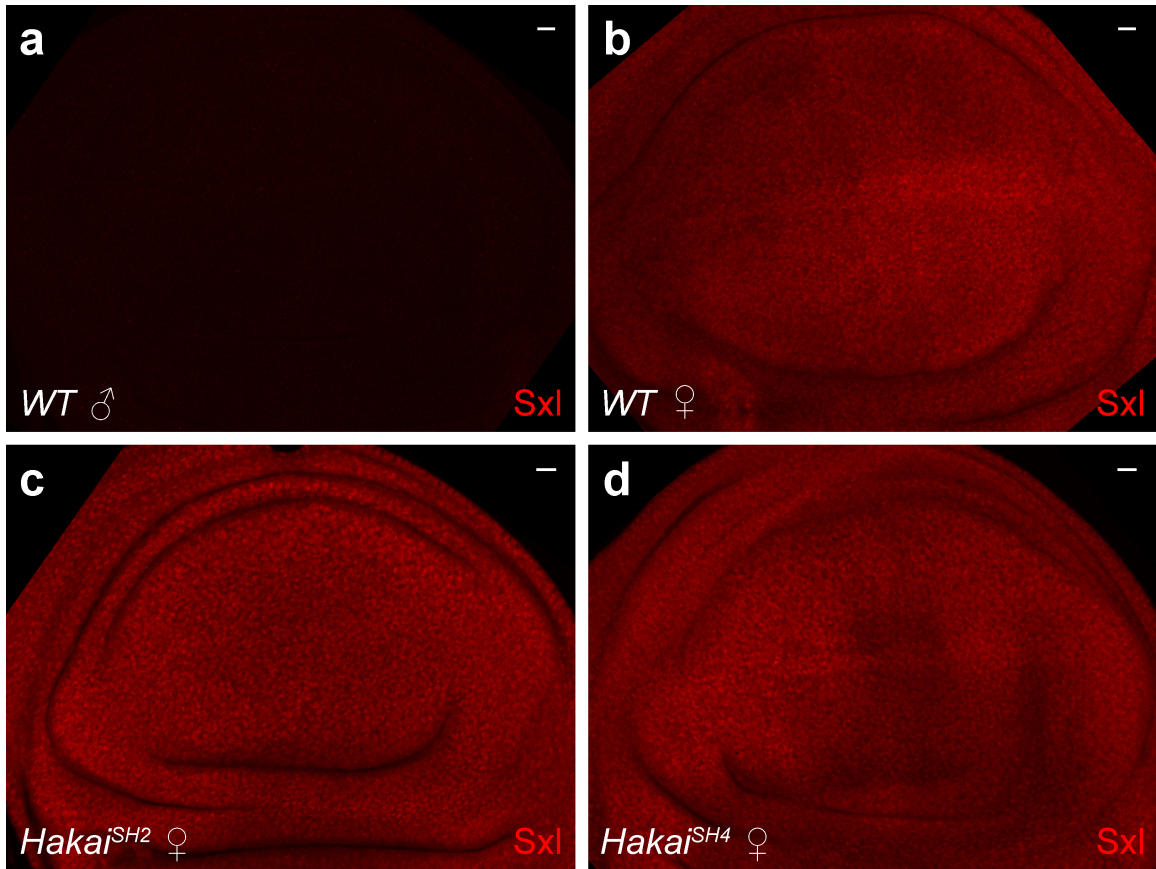

**Supplementary Figure 4. Hakai is not required for Sxl protein levels in discs**

In wild-type, Sxl protein is only expressed in female (b), but not male (a) wing discs, as shown by Sxl antibody staining. c-d Sxl protein levels are not reduced in *Hakai*<sup>SH2</sup> and *Hakai*<sup>SH4</sup> female discs. The experiments in a-d were repeated at least twice independently with similar results, and each time around 30 wing discs for any genotype were examined. Scale bars, 10  $\mu$ m.

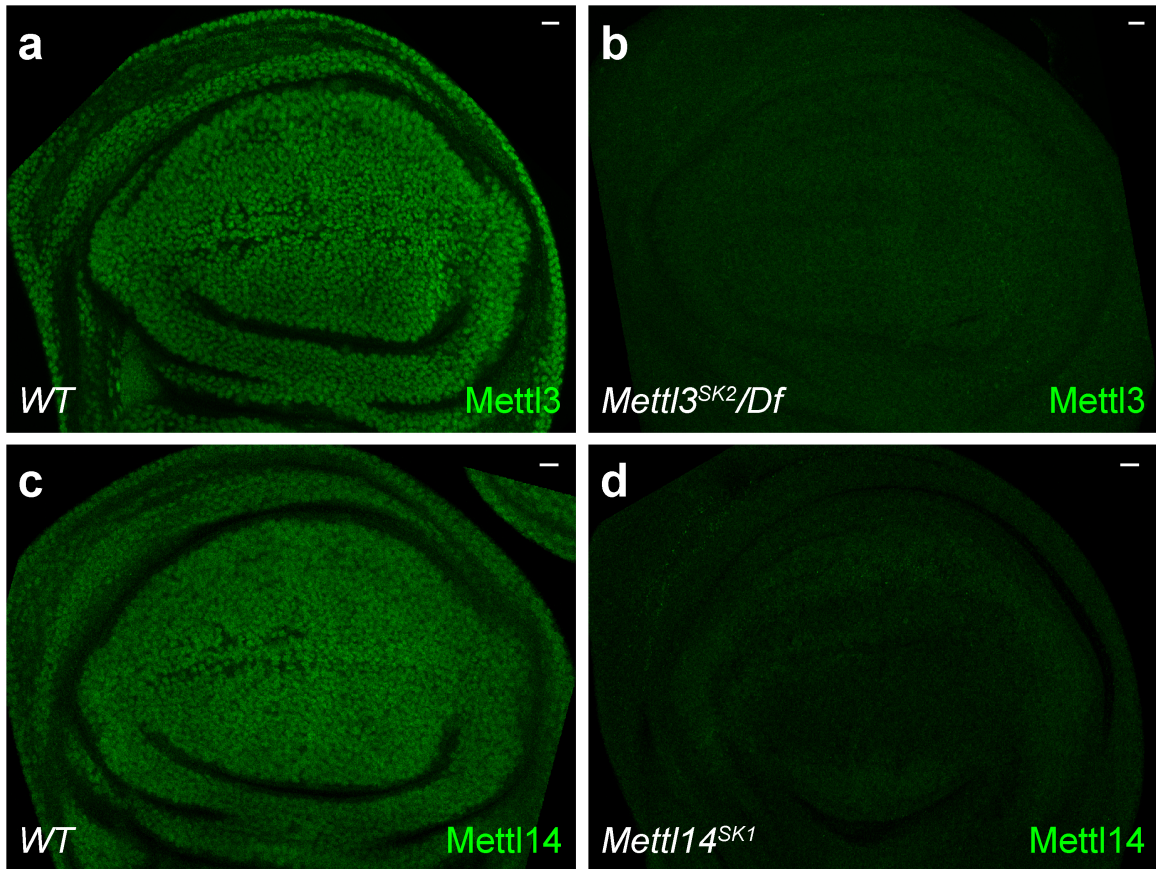

**Supplementary Figure 5. Validation of Mettl3 and Mettl14 antibodies and alleles**

In wild-type wing discs, Mettl3 (a) and Mettl14 (c) show ubiquitous nuclear staining. In *Mettl3<sup>SK2</sup>/Df* or *Mettl14<sup>SK1</sup>* mutant discs, no detectable level of Mettl3 (b) or Mettl14 (d) protein remains, respectively. The experiments in a-d were repeated at least twice independently with similar results, and each time around 30 wing discs for any genotype were examined. Scale bars, 10  $\mu$ m.

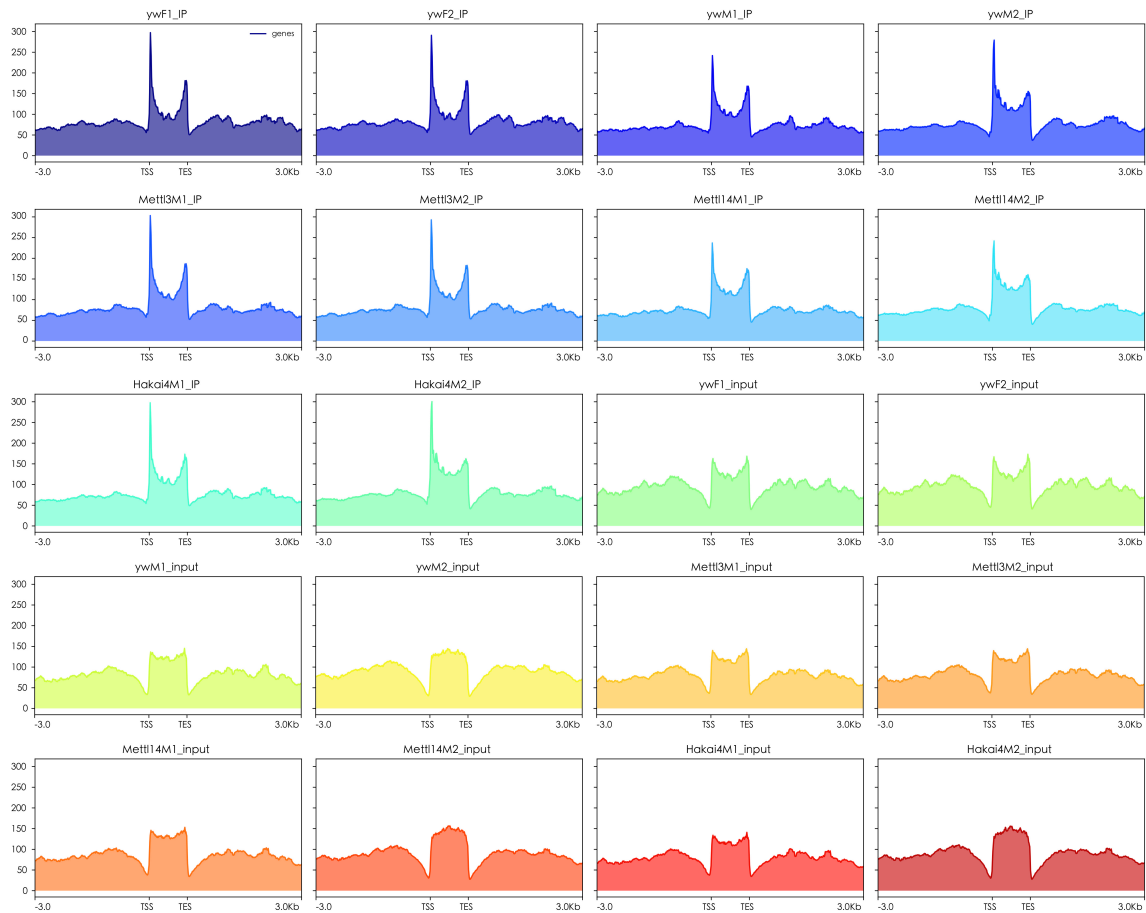

**Supplementary Figure 6. Distribution of mapped reads in m<sup>6</sup>A-IP and input samples**

Distribution of mapped reads from m<sup>6</sup>A-IP and input along genes for *yw* female, *yw* male, *Mettl3* male, *Mettl14* male, and *Hakai* male flies. We performed two replicates for each genotype. Note the enrichment around transcription start sites (TSS) and transcription end sites (TES) in IP samples but not input, validating our MeRIP-seq.

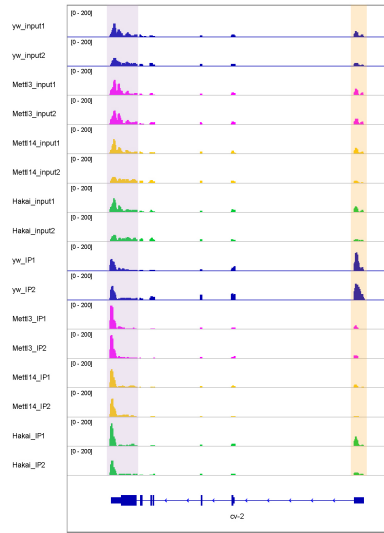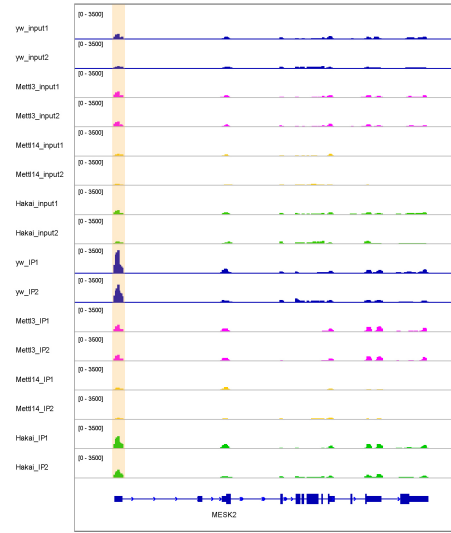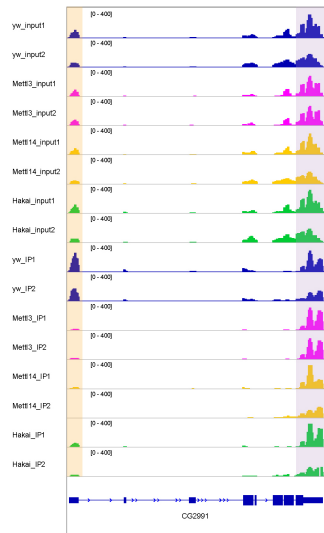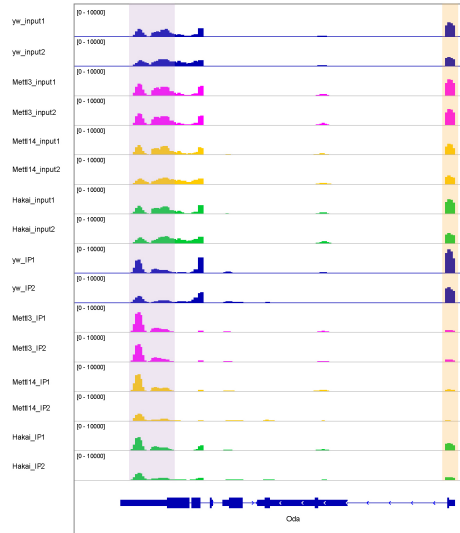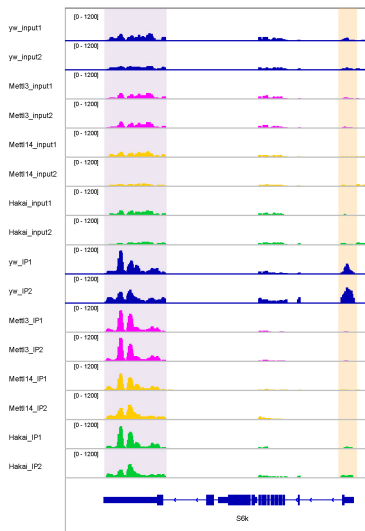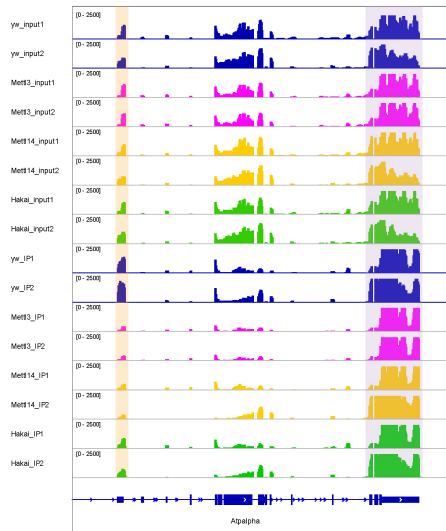

**Supplementary Figure 7. Examples of reduced m<sup>6</sup>A peaks in *Mettl3*, *Mettl14*, and *Hakai* mutants**

Integrative Genomics Viewer (IGV) tracks displaying MeRIP-seq (lower panels, IP) and RNA-seq (upper panels, input) reads along indicated mRNAs in *yw*, *Mettl3*, *Mettl14*, and *Hakai* male flies. Two replicates are shown. Note the reduced peaks in 5' UTRs (shaded in yellow) and peaks in 3' UTRs (shaded in purple) are generally not changed.



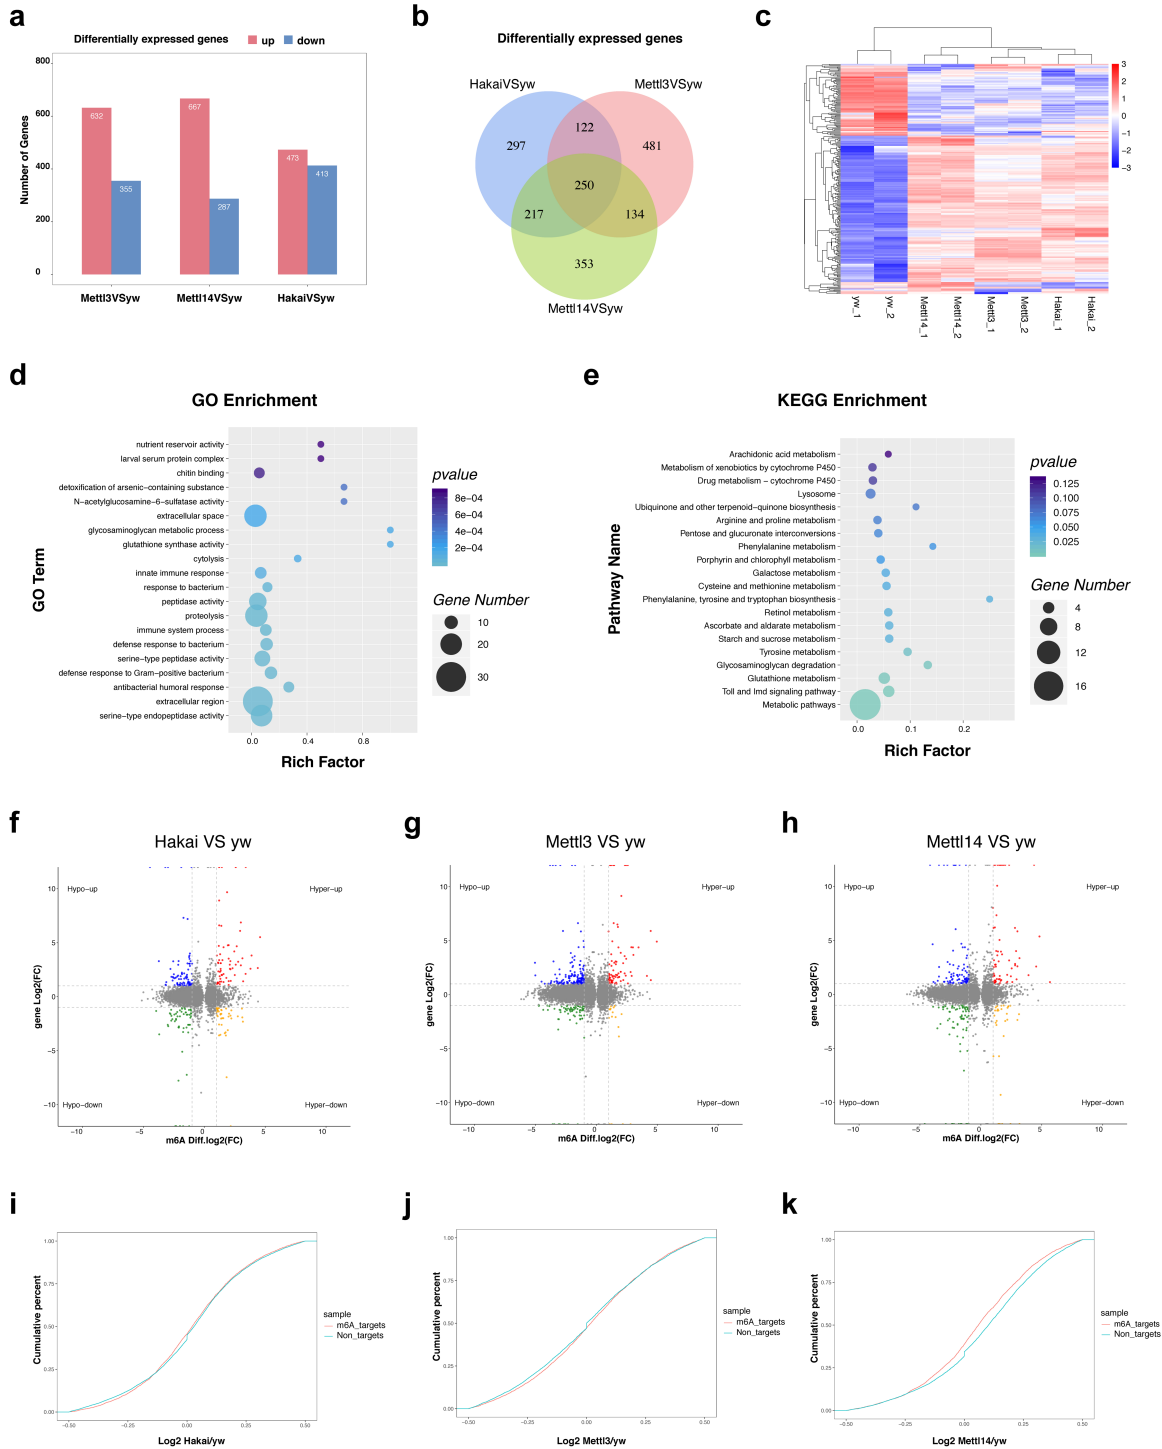

**Supplementary Figure 8. Hakai regulates common transcripts with Mettl3 and Mettl14**

**a** Numbers of differentially expressed genes ( $p < 0.05$  and fold change  $\geq 2$  or  $\leq 0.5$ ) in *Mettl3*, *Mettl14*, and *Hakai* mutant male adult flies versus *yw* control. **b** Venn diagram showing common differentially expressed genes between them. **c** Heat map showing the relative expression of 250 common differentially expressed genes in *Mettl3*, *Mettl14*, *Hakai* and *yw* flies. **d** GO term and **e** KEGG pathway analysis of 250 common differentially expressed genes between *Mettl3*, *Mettl14*, and *Hakai*. The top 20 terms are displayed. Two-sided Fisher's exact test. **f-h** Four quadrant plots showing differential m<sup>6</sup>A peaks together with differential mRNA expression in *Mettl3* (**g**), *Mettl14* (**h**), and *Hakai* (**f**) mutants versus *yw*. Hyper- or Hypo- means increased or decreased m<sup>6</sup>A peaks; Up or down means increased or decreased mRNA expression levels. **i-k** Cumulative percent distribution of fold changes (log<sub>2</sub>) of RNA expression in *Mettl3* (**j**), *Mettl14* (**k**), and *Hakai* (**i**) mutants over *yw* separated between m<sup>6</sup>A targets and non-targets.

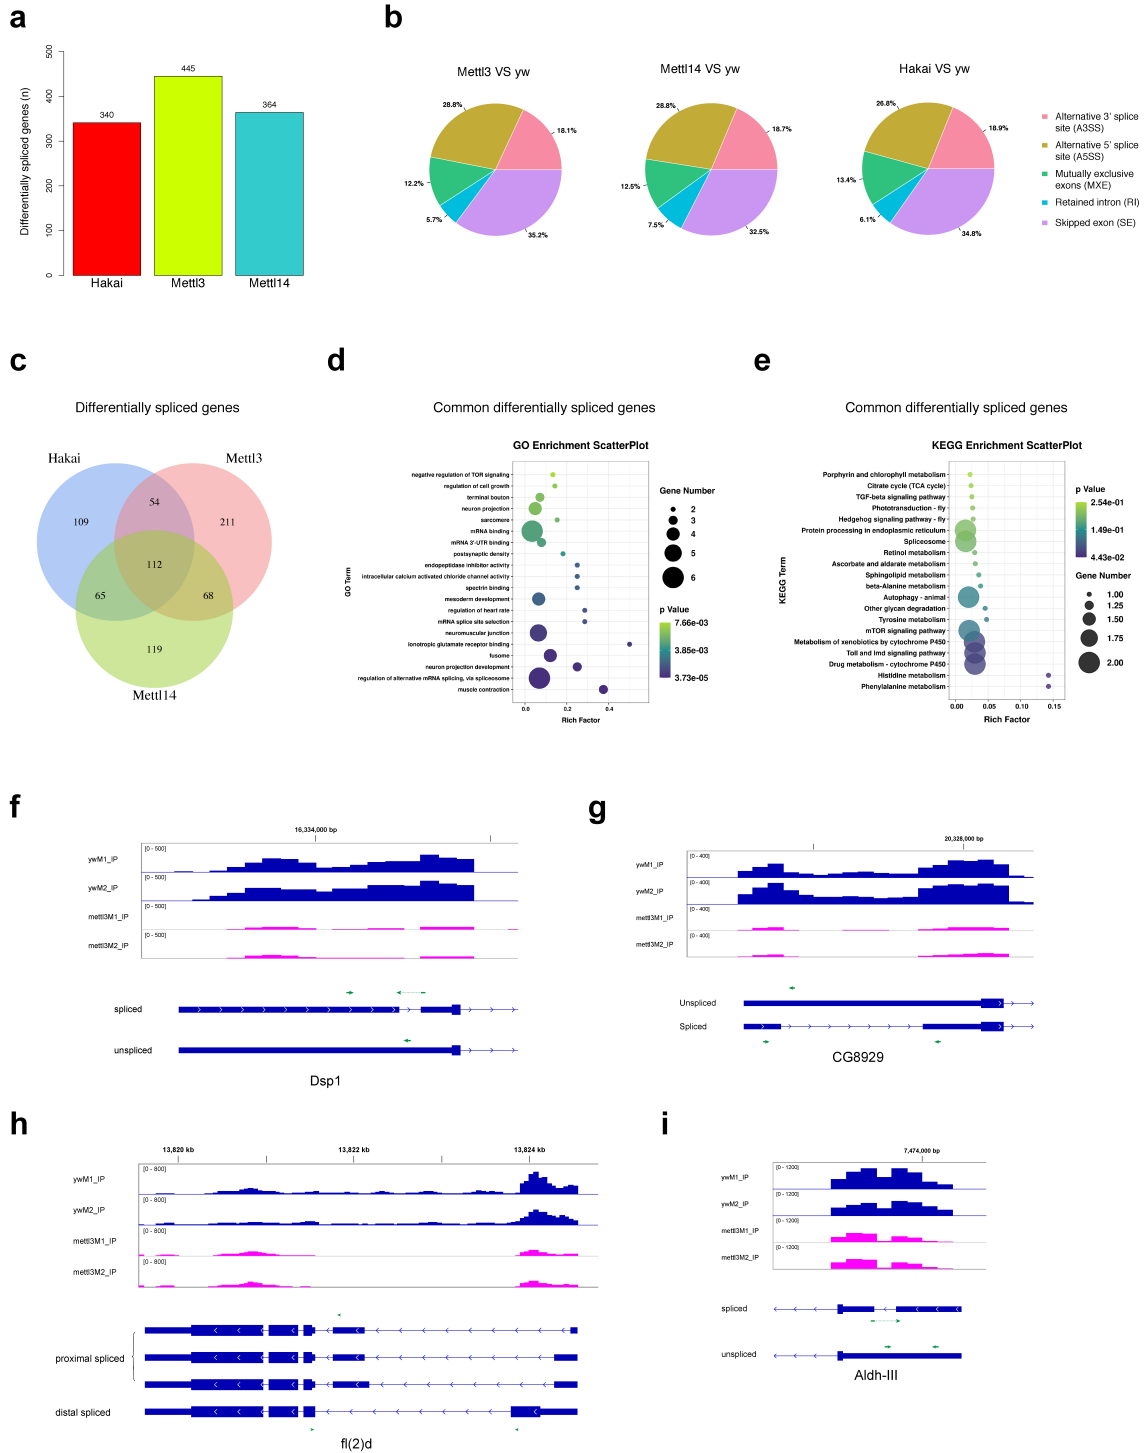

**Supplementary Figure 9. Splicing analysis in *Mettl3*, *Mettl14*, or *Hakai* mutant**

**a** Numbers of differentially spliced genes (FDR<0.05 and IncLevelDifference $\geq$ 0.2 or  $\leq$ -0.2) in *Mettl3*, *Mettl14*, and *Hakai* mutant male adult flies versus yw control. **b**

Classification of differentially spliced events in the three mutants. **c** Venn diagram showing common differentially spliced genes between them. **d** GO term and **e** KEGG pathway analysis of common differentially spliced genes between *Mettl3*, *Mettl14*, and *Hakai*. The top 20 terms are displayed. Two-sided Fisher's exact test. **f-i** IGV tracks displaying MeRIP-seq along four m<sup>6</sup>A-dependent, alternatively spliced regions in *yw* and *Mettl3* mutant flies. The heavy methylated m<sup>6</sup>A peaks around splicing junctions in wild-type are reduced in *Mettl3* mutant. The positions of qPCR primers used in Fig. 3c are also indicated.
